# Supplementary material for: Clinical practice guidelines for percutaneous endoscopic gastrostomy
Source: PubMed Central journal article supplement — Clin Endosc. 2023 Jun 23;56(4):391–408. doi: 10.5946/ce.2023.062 (PMC10393568; doi:10.5946/ce.2023.062), 2023-06-23
Supplement: ce-2023-062-Supplementary-Fig-4.pdf [file ce-2023-062-Supplementary-Fig-4.pdf]

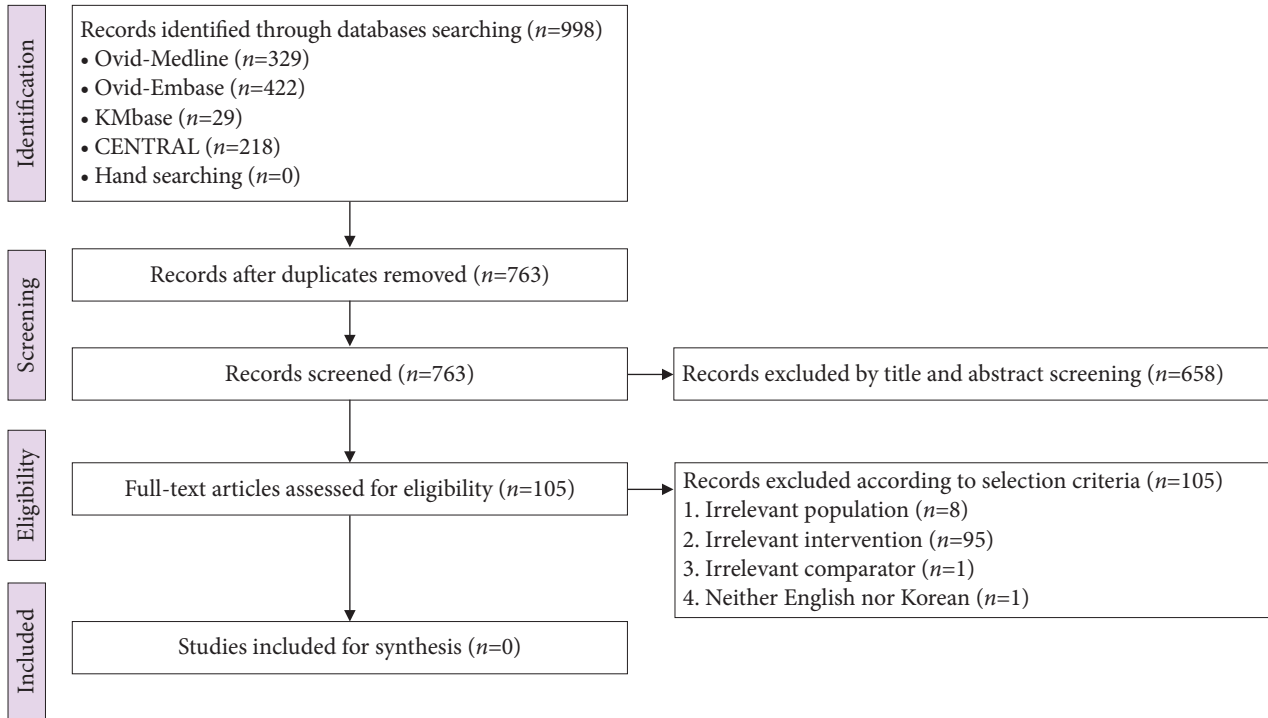

**Supplementary Fig. 4.** PRISMA flow diagram of peristomal leakage. CENTRAL, Cochrane Central Register of Controlled Trials.
