# Supplementary material for: Clinical practice guidelines for percutaneous endoscopic gastrostomy
Source: PubMed Central journal article supplement — Clin Endosc. 2023 Jun 23;56(4):391–408. doi: 10.5946/ce.2023.062 (PMC10393568; doi:10.5946/ce.2023.062), 2023-06-23
Supplement: ce-2023-062-Supplementary-Table-2.pdf [file ce-2023-062-Supplementary-Table-2.pdf]

**Supplementary Table 2.** Summary of evidence for prophylactic antibiotics

| Study                              | Publication year | Country         | Study period | Population (adults vs. children) | Major indications for PEG                                  | No. of participants | PEG method | IV antibiotics                        | Control        | Follow-up (day) | Antibiotics-related adverse event (n)                                                                                   |
|------------------------------------|------------------|-----------------|--------------|----------------------------------|------------------------------------------------------------|---------------------|------------|---------------------------------------|----------------|-----------------|-------------------------------------------------------------------------------------------------------------------------|
| Jonas et al. <sup>37</sup>         | 1985             | USA             | 1982–1984    | N/A                              | Swallowing dysfunction, head and neck cancer               | 33                  | Pull       | Cefoxitin                             | Placebo        | ≥4              | N/A                                                                                                                     |
| Jain et al. <sup>38</sup>          | 1987             | USA             | 1984–1986    | N/A                              | Swallowing dysfunction, oropharyngeal cancer               | 55                  | Pull       | Cefazolin                             | Placebo        | 2–7             | N/A                                                                                                                     |
| Akkersdijk et al. <sup>39</sup>    | 1995             | The Netherlands | N/A          | N/A                              | Swallowing dysfunction, oropharyngeal cancer               | 69                  | Pull       | Amoxicillin/clavulanic acid           | No antibiotics | 30              | N/A                                                                                                                     |
| Sturgis et al. <sup>40</sup>       | 1996             | USA             | 1994–1995    | N/A                              | Neurological diseases, malignancy                          | 61                  | Pull       | Cefazolin                             | Placebo        | 7               | N/A                                                                                                                     |
| Gossner et al. <sup>41</sup>       | 1999             | Germany         | 1993–1995    | N/A                              | Swallowing dysfunction, obstruction                        | 307                 | Pull       | Cefotaxime or piperacillin/tazobactam | No antibiotics | 7               | N/A                                                                                                                     |
| Preclik et al. <sup>42</sup>       | 1999             | Germany         | N/A          | Adults                           | Swallowing dysfunction, oropharyngeal or esophageal cancer | 84                  | Pull       | Amoxicillin/clavulanic acid           | Placebo        | ≥7              | Antibiotics group: nausea (1), seizure (1)<br>Placebo group: vomiting (1), suspected allergic exanthema (1)             |
| Dormann et al. <sup>43</sup>       | 2000             | Germany         | N/A          | Adults                           | Swallowing dysfunction, malignancy                         | 216                 | Pull       | Ceftriaxone                           | No antibiotics | 10              | N/A                                                                                                                     |
| Panigrahi et al. <sup>44</sup>     | 2002             | UK              | N/A          | Adults                           | Swallowing dysfunction, malignancy                         | 58                  | Pull       | Amoxicillin/clavulanic acid           | Placebo        | 7, 28           | N/A                                                                                                                     |
| Ahmad et al. <sup>45</sup>         | 2003             | UK              | N/A          | Adults                           | Swallowing dysfunction, oropharyngeal cancer               | 66                  | Pull       | Cefuroxime                            | Placebo        | 7               | Antibiotics group: Clostridium difficile-associated diarrhea (3)<br>Placebo group: C. difficile-associated diarrhea (0) |
| Saadeddin et al. <sup>46</sup>     | 2005             | UK              | 2001–2003    | Adults                           | Swallowing dysfunction                                     | 83                  | Pull       | Amoxicillin/clavulanic acid           | Placebo        | ≥7              | N/A                                                                                                                     |
| Radhakrishnan et al. <sup>47</sup> | 2006             | UK              | 1999–2004    | N/A                              | Swallowing dysfunction                                     | 62                  | Pull       | Cefuroxime                            | No antibiotics | 7               | N/A                                                                                                                     |
| Shastri et al. <sup>49</sup>       | 2008             | Germany         | 2003–2007    | N/A                              | Malignancy                                                 | 93                  | Push       | Ceftriaxone                           | Placebo        | 7               | N/A                                                                                                                     |
| Adachi et al. <sup>50</sup>        | 2016             | Japan           | 2009–2013    | N/A                              | Swallowing dysfunction                                     | 90                  | Push       | Ampicillin/sulbactam                  | Placebo        | 7               | N/A                                                                                                                     |
| Alessandri et al. <sup>48</sup>    | 2021             | Italy           | 2014–2019    | Children                         | Swallowing dysfunction                                     | 49                  | Pull       | Amoxicillin/clavulanic acid           | Placebo        | 14              | Antibiotics group: none<br>Placebo group: none                                                                          |

PEG, percutaneous endoscopic gastrostomy; IV, intravenous; N/A, not applicable.
