# Supplementary material for: Clinical practice guidelines for percutaneous endoscopic gastrostomy
Source: PubMed Central journal article supplement — Clin Endosc. 2023 Jun 23;56(4):391–408. doi: 10.5946/ce.2023.062 (PMC10393568; doi:10.5946/ce.2023.062), 2023-06-23
Supplement: ce-2023-062-Supplementary-Table-4.pdf [file ce-2023-062-Supplementary-Table-4.pdf]

**Supplementary Table 4.** Summary of evidence for type of gastrostomy tube (patients without upper aerodigestive tract cancers)

| Study                         | Publication year | Country | Study period    | Study design  | Major indications for PEG                                                 | No. of participants | Pull method                                     | Push method | Success rate                |             | Complication rates                                                  |                                                                     |
|-------------------------------|------------------|---------|-----------------|---------------|---------------------------------------------------------------------------|---------------------|-------------------------------------------------|-------------|-----------------------------|-------------|---------------------------------------------------------------------|---------------------------------------------------------------------|
|                               |                  |         |                 |               |                                                                           |                     |                                                 |             | Pull method                 | Push method | Pull method                                                         | Push method                                                         |
| Ohno et al. <sup>60</sup>     | 2015             | Japan   |                 | Observational |                                                                           | 113                 | 22                                              | 91          |                             |             |                                                                     |                                                                     |
| Retes et al. <sup>61</sup>    | 2017             | Brazil  | 2008.12–2013.10 | Observational | Head and neck cancer                                                      | 309                 | 172                                             | 137         | N/A                         | N/A         | Early: 13 (7.6%)<br>Late: 42 (24.4%)                                | Early: 5 (3.6%)<br>Late: 40 (29.2%)                                 |
| Van Dyck et al. <sup>64</sup> | 2011             | Belgium | 2006–2008       | Observational | Head and neck cancer or esophageal malignancies                           | 57                  | 33                                              | 24          | 33 (100%)                   | 20 (83%)    | Early: 4 (12%)<br>Mortality: 0 (0%)                                 | Early: 11 (48%)<br>Mortality: 2 (8%)                                |
| Tucker et al. <sup>63</sup>   | 2003             | USA     | 1999–2001       | Observational | Head and neck cancer                                                      | 79                  | 50                                              | 29          | N/A                         | N/A         | 15 (30%)                                                            | 0 (0%)                                                              |
| Köhler et al. <sup>58</sup>   | 2015             | Austria | 2009–2012       | Observational |                                                                           | 231                 | 131                                             | 100         |                             |             | Overall complication rate: 28 (21.4%)                               | Overall complication rate: 33 (33%)                                 |
| Campoli et al. <sup>57</sup>  | 2012             | Brazil  |                 | Meta-analysis |                                                                           | 2,336               | From 6 comparative and 10 observational studies |             | N/A                         | N/A         | Dislocation of the tube: 5 (3.8%)<br>Occlusion of the PEG: 1 (0.8%) | Dislocation of the tube: 12 (12%)<br>Occlusion of the PEG: 10 (10%) |
| Lee et al. <sup>56</sup>      | 2014             | Korea   | 2009.1–2012.6   | Observational | Neurologic disease (58.7%), malignancy (21.7%), other indications (19.6%) | 141                 | 77                                              | 58          | Overall success rate: 96.5% | 2/58 (3.4%) | 29/71 (40.8%)                                                       | 25/54 (46.3%)                                                       |
| Sartori et al. <sup>62</sup>  | 1996             | Italy   |                 | Observational |                                                                           | 80                  | 39                                              | 41          | 100%                        | 100%        | 1/39 (2.6%)                                                         | 1/41 (2.4%)                                                         |
| Maetani et al. <sup>59</sup>  | 2003             | Japan   | 1999.9–2002.5   | Observational | Patients with dysphagia                                                   | 58                  | 29                                              | 29          | 100%                        | 100%        | Peristomal infection: 9 (31.0%)                                     | Peristomal infection: 0                                             |
| Pih et al. <sup>28</sup>      | 2018             | Korea   | 2005–2015       | Observational |                                                                           | 411                 | 139                                             | 262         | N/A                         | N/A         | 30-day mortality: 8 (5.8%)                                          | 30-day mortality: 12 (4.6%)                                         |

Values are presented as number (%), unless otherwise indicated.

N/A, not applicable; PEG, percutaneous endoscopic gastrostomy; OR, odds ratio; CI, confidence interval.
