# Supplementary material for: Clinical practice guidelines for percutaneous endoscopic gastrostomy
Source: PubMed Central journal article supplement — Clin Endosc. 2023 Jun 23;56(4):391–408. doi: 10.5946/ce.2023.062 (PMC10393568; doi:10.5946/ce.2023.062), 2023-06-23
Supplement: ce-2023-062-Supplementary-Table-5.pdf [file ce-2023-062-Supplementary-Table-5.pdf]

**Supplementary Table 5.** Summary of evidence for type of gastrostomy tube (patients with upper aerodigestive tract cancers)

| Study                     | Publication year | Country | Study period        | Population (adults vs. children) | Major indications for PEG | No. of participants    | Pull method | Push method | PEG metastasis rates                                                    |                             |
|---------------------------|------------------|---------|---------------------|----------------------------------|---------------------------|------------------------|-------------|-------------|-------------------------------------------------------------------------|-----------------------------|
|                           |                  |         |                     |                                  |                           |                        |             |             | Pull method                                                             | Push method                 |
| Siu et al. <sup>66</sup>  | 2020             | USA     | To 2019             | Adults (age ≥18 yr)              | UADT malignancies         | 10,388 From 98 Studies | 7,887       | 2,501       | 0.56% (95% CI, 0.40%–0.79%)                                             | 0.29% (95% CI, 0.15%–0.55%) |
| Fung et al. <sup>65</sup> | 2017             | USA     | 1/5/2009–12/22/2014 | Adults                           | Head and neck malignancy  | 777                    | 777         | -           | 5 (1 stromal metastasis, 4 radiologically detected either on CT or PET) | -                           |

PEG, percutaneous endoscopic gastrostomy; UADT, upper aerodigestive tract; CI, confidence interval; CT, computed tomography; PET, positron emission tomography.
