# Supplementary material for: Clinical practice guidelines for percutaneous endoscopic gastrostomy
Source: PubMed Central journal article supplement — Clin Endosc. 2023 Jun 23;56(4):391–408. doi: 10.5946/ce.2023.062 (PMC10393568; doi:10.5946/ce.2023.062), 2023-06-23
Supplement: ce-2023-062-Supplementary-Table-7.pdf [file ce-2023-062-Supplementary-Table-7.pdf]

**Supplementary Table 7.** Summary of evidence for replacement of gastrostomy tube

| Study                                 | Country | Study period | Study design       | Timing of replacement                     | No. of participants                                                        | No. of total replacements | Tube type        | Method of replacement         | No. of routine or short interval replacements | No. of on-demand or long interval replacements | Main outcomes                                                                                                                                                                | Comparison (routine vs. on-demand)                                                                                                           |
|---------------------------------------|---------|--------------|--------------------|-------------------------------------------|----------------------------------------------------------------------------|---------------------------|------------------|-------------------------------|-----------------------------------------------|------------------------------------------------|------------------------------------------------------------------------------------------------------------------------------------------------------------------------------|----------------------------------------------------------------------------------------------------------------------------------------------|
| Nishiwaki et al. (2011) <sup>86</sup> | Japan   | 2000–2010    | Retrospective      | Routine replacement (4–8 mo) or on-demand | 317                                                                        | 1,092                     | Internal bloster | Percutaneous traction         | 1,070                                         | 22                                             | 13 Complications associated with replacement (1.2%): fistular disruption: 8 (0.7%), hemorrhage: 4 (0.4%); device breakage: 1 (0.1%)                                          | No differences in complications between routine and on-demand replacement (data not presented)                                               |
| Lee et al. (2013) <sup>89</sup>       | Korea   | 2008–2012    | Retrospective      | Routine placement or on-demand            | 330                                                                        | N/A                       | Internal bloster | Percutaneous endoscopic (176) | 264                                           | 66 (37: PEG site infection, 14: leakage)       | 1) Immediate complication 16 (4.8%): laceration 13 (3.9%); bleeding 2 (0.1%), perforation 1 (0.03%).<br>2) Late complications 8 (2.4%): infection 5 (1.5%), leakage 3 (0.9%) | Short interval of replacement ( $\leq 6$ mo) shows higher mechanical complication than long interval ( $> 6$ months): 11 (6.3%) vs. 3 (1.9%) |
| Jo et al. (2014) <sup>88</sup>        | Korea   | 2009–2014    | Retrospective      | On-demand                                 | 72 (30: displacement, 22: obstruction, 10: leakage, 8: PEG site infection) | N/A                       | Internal bloster | N/A                           | 57 (early replacement)                        | 15 (late replacement)                          | The 'early exchange' group had a lower BMI than 'late exchange' group (19.7 $\pm$ 3.57 vs. 22.4 $\pm$ 3.87). Reason of replacement was not different between two groups.     | Replacement associated complications were not analyzed between the two groups (Reason of replacement is analyzed).                           |
| Lisotti et al. (2019) <sup>87</sup>   | Italy   | 2016–2018    | Prospective cohort | Routine placement or on-demand            | 99                                                                         | 234                       | Balloon type     | N/A                           | 203                                           | 31                                             | Among 203 elective tube placements, 197 (97.0%) have been performed at home. No adverse events were reported.                                                                | Comparison between routine vs. on-demand replacement was not presented.                                                                      |

(Continued to the next page)

**Supplementary Table 7.** Continued

| Study                             | Country | Study period  | Study design  | Timing of replacement | No. of participants                              | No. of total replacements | Tube type                   | Method of replacement | No. of routine or short interval replacements | No. of on-demand or long interval replacements | Main outcomes                                                                                                                                                                                                           | Comparison (routine vs. on-demand)                                                                             |
|-----------------------------------|---------|---------------|---------------|-----------------------|--------------------------------------------------|---------------------------|-----------------------------|-----------------------|-----------------------------------------------|------------------------------------------------|-------------------------------------------------------------------------------------------------------------------------------------------------------------------------------------------------------------------------|----------------------------------------------------------------------------------------------------------------|
| Sbeit et al. (2021) <sup>30</sup> | Israel  | Not presented | Retrospective | On-demand             | 48 (leak: 20, obstruction: 10, dislodgement: 18) | N/A                       | Bumper type or balloon type | N/A                   | 22                                            | 26                                             | No difference of PEG-related long-term complication (leak: 8/22 vs. 12/26, $p=0.057$ ; obstruction: 5/22 vs. 5/26, $p=0.72$ ; dislodgement: 9/22 vs. 9/26, $p=0.76$ ) between replacement within 6 vs. beyond 6 months. | Replacement associated complications are not presented between two groups (Reason of replacement is analyzed). |

N/A, not applicable; PEG, percutaneous endoscopic gastrostomy; BMI, body mass index.
